# Supplementary material for: Combinatorial delivery of CPI444 and vatalanib loaded on PEGylated graphene oxide as an effective nanoformulation to target glioblastoma multiforme: In vitro evaluation
Source: PubMed Central journal article supplement (PMC9426685; doi:10.3389/fonc.2022.953098), 2022-08-16
Supplement: DataSheet_1.pdf [file DataSheet_1.pdf]

## **Combinatorial Delivery of CPI444 and Vatalanib Loaded on PEGylated Graphene Oxide as an Effective Nanoformulation to Target Glioblastoma Multiforme: In vitro Evaluation**

Vishnu S. Mishra,<sup>1†</sup> Sachin Patil,<sup>2†</sup> Puli Chandramouli Reddy,<sup>\*1</sup> and Bimlesh Lochab<sup>\*2</sup>

<sup>1</sup>Department of Life Sciences, School of Natural Sciences, Shiv Nadar University, Delhi-NCR, 201314, India.

<sup>2</sup>Materials Chemistry Laboratory, Department of Chemistry, School of Natural Sciences, Shiv Nadar University, Delhi-NCR, 201314, India.

\*Corresponding authors: Puli Chandramouli Reddy (pc.reddy@snu.edu.in); Bimlesh Lochab (bimlesh.lochab@snu.edu.in)

**Figure S1. Quantitative and qualitative analysis for formation of Vatalanib@GO-PEG using UV-vis. spectroscopy: (a)** UV-vis. spectra of Vatalanib solution recorded at different concentrations in (water: THF) solvent mixture, **(b)** Linear equation obtained from standard curve at wavelength maximum at 335 nm, **(c)** UV-vis. spectra recorded for unbound Vatalanib, **(d)** UV-vis. spectra for GO-PEG and purified Vatalanib@GO-PEG.

**Figure S2.** Cellular uptake of PEGylated Graphene Oxide Nanoparticles was confirmed and validated by FACS study.

**Figure S3.** Intracellular calcium ions determined by FACS analysis.

**Figure S4.** CD24 expression analysis in GBM cells by FACS.

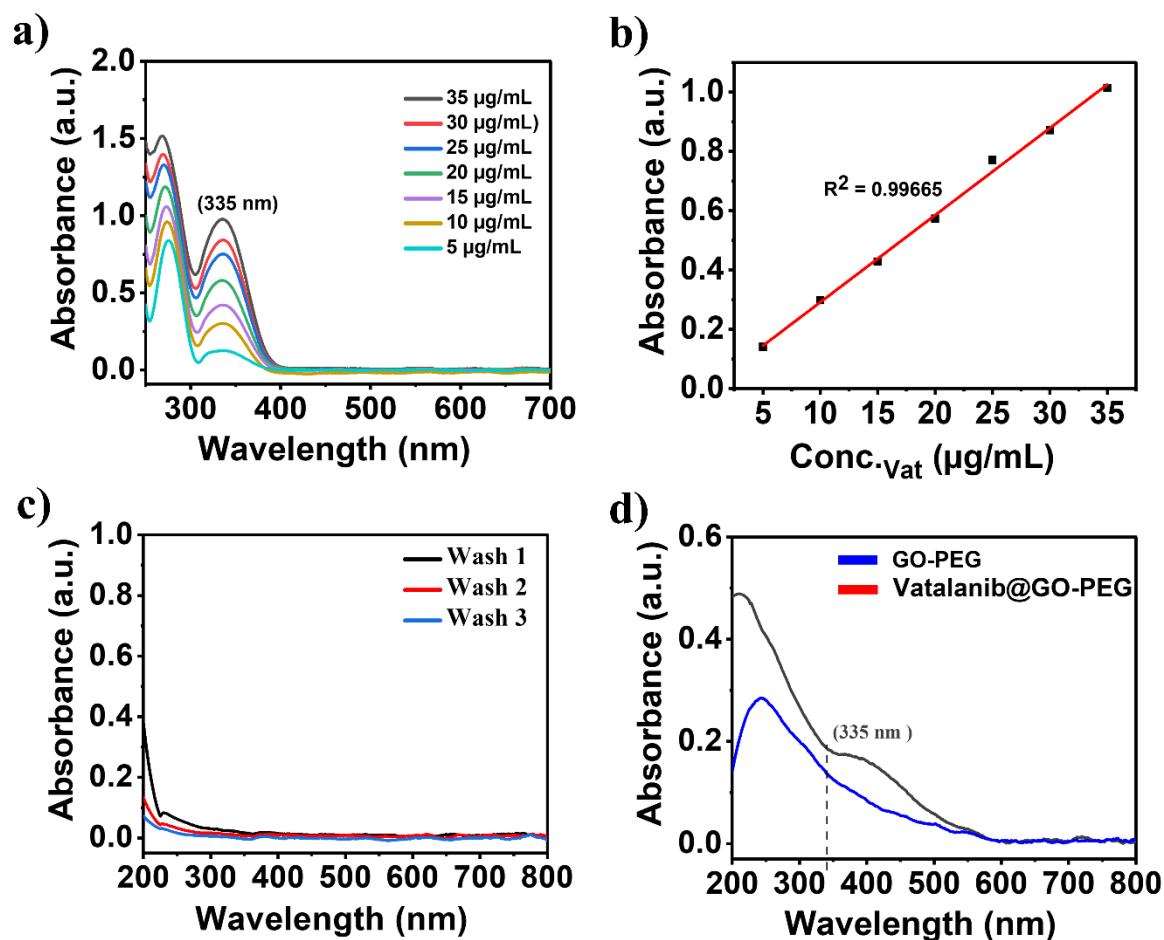

**Figure S1. Quantitative and qualitative analysis for formation of Vatalanib@GO-PEG using UV-vis. spectroscopy: (a)** UV-vis. spectra of Vatalanib solution recorded at different concentrations in (water: THF) solvent mixture, **(b)** Linear equation obtained from standard curve at wavelength maximum at 335 nm, **(c)** UV-vis. spectra recorded for unbound Vatalanib, **(d)** UV-vis. spectra for GO-PEG and purified Vatalanib@GO-PEG.

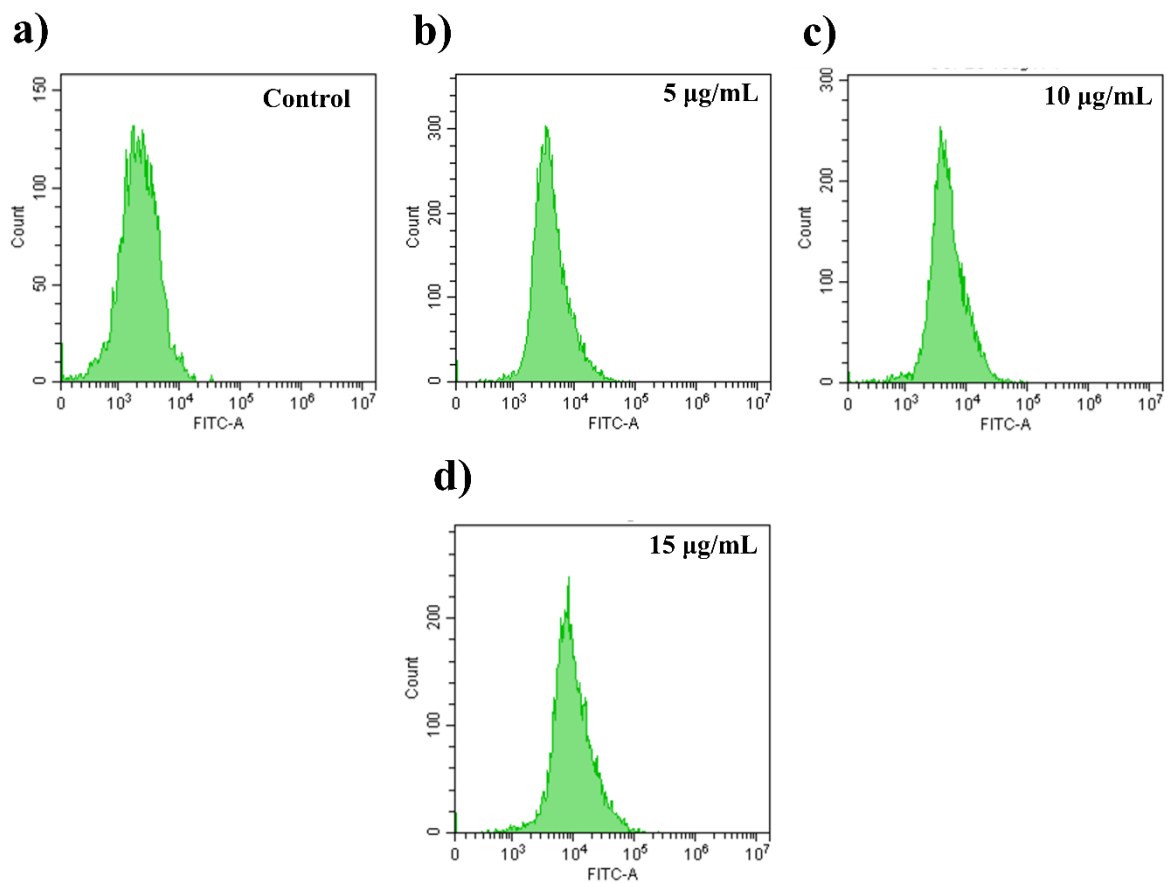

**Figure S2.** Cellular uptake of PEGylated Graphene Oxide Nanoparticles was confirmed and validated by FACS study.

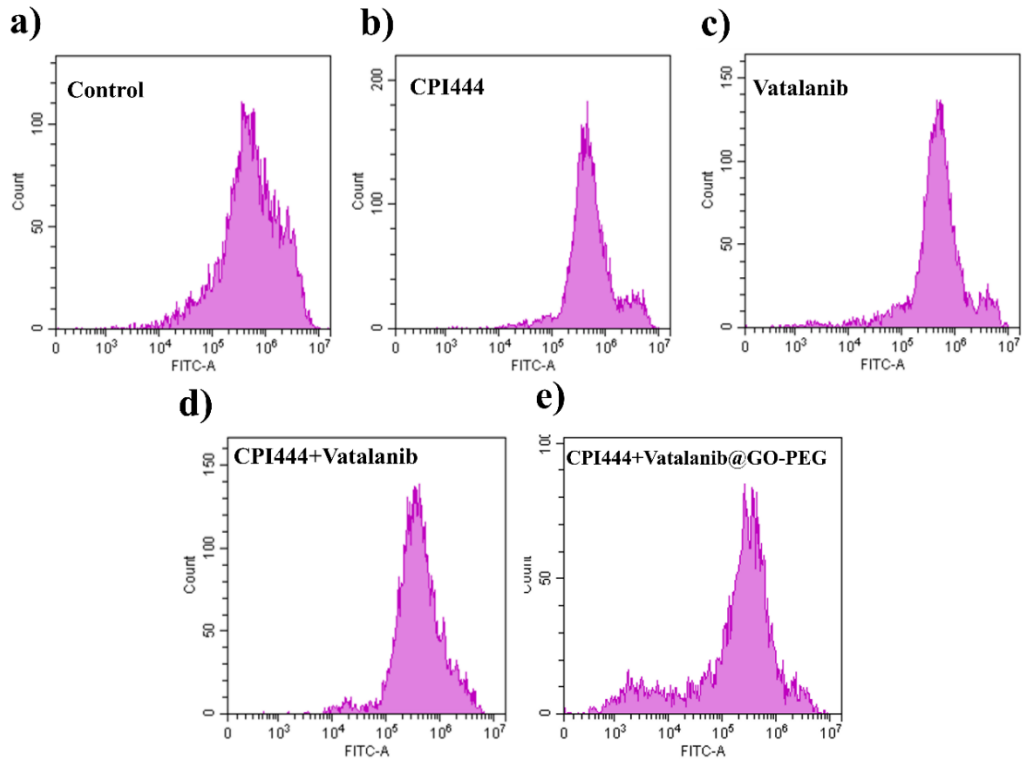

**Figure S3.** Intracellular calcium ions determined by FACS analysis.

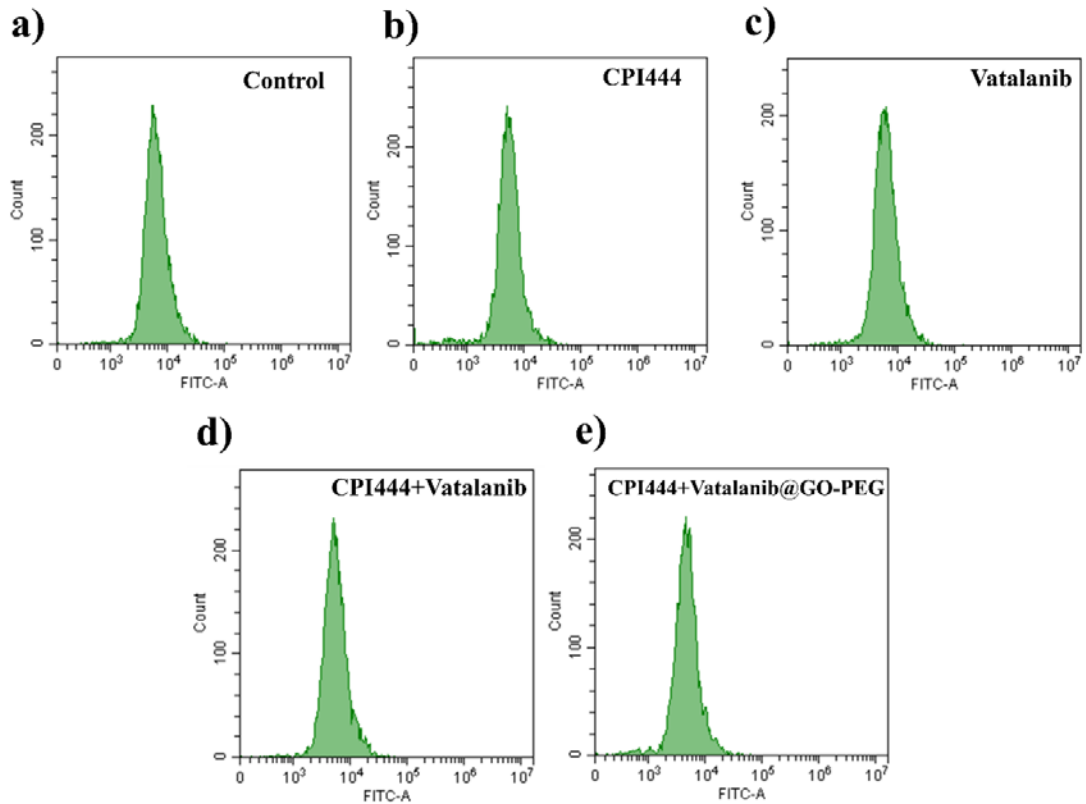

**Figure S4.** CD24 expression analysis in GBM cells by FACS.
